# Supplementary material for: Regulated and Emerging Mycotoxins in Bulk Raw Milk: What Is the Human Risk?
Source: MDPI journal article supplement (doi:10.3390/toxins15100605), 2023-10-09
Supplement: s1 [file s1]

# Supplementary Materials: Regulated and Emerging Mycotoxins in Bulk Raw Milk: What Is the Human Risk?

Marta Leite, Andreia Freitas, Jorge Barbosa and Fernando Ramos

**Table S1.** Hazard Quotient values for mycotoxin consumption in milk samples, for total number of positives (mean and maximum concentrations) and for total number of samples (n=100) (lower (LB) and upper bound (UB)) considering TDI.

|                       | TDI (ng kg <sup>-1</sup> bw day <sup>-1</sup> ) <sup>[1]</sup> | Total number of positive samples |              | Total number of samples |              |
|-----------------------|----------------------------------------------------------------|----------------------------------|--------------|-------------------------|--------------|
|                       |                                                                | HQ (Mean)                        | HQ (Maximum) | HQ (LB)                 | HQ (UB)      |
| AFB1                  | -                                                              | No TDI established               |              |                         |              |
| AFB2                  | -                                                              | No TDI established               |              |                         |              |
| AFM1                  | -                                                              | No TDI established               |              |                         |              |
| BEA                   | -                                                              | No TDI established               |              |                         |              |
| ENNA                  | -                                                              | No TDI established               |              |                         |              |
| ENNB                  | -                                                              | No TDI established               |              |                         |              |
| FB1*                  | -                                                              | -                                | -            | -                       | -            |
| FB2*                  | -                                                              | -                                | -            | -                       | -            |
| HT-2**                | -                                                              | -                                | -            | -                       | -            |
| MON                   | -                                                              | No TDI established               |              |                         |              |
| PAT                   | 400                                                            | -                                | -            | 0.0002 (0.02%)          | 0.006 (0.6%) |
| T-2**                 | -                                                              | -                                | -            | -                       | -            |
| ZEA                   | 250                                                            | -                                | -            | 0.007 (1%)              | 0.038 (4%)   |
| Sum of FB1 and FB2*   | 2000                                                           | -                                | -            | 0.0003 (0.03%)          | 0.004 (0.4%) |
| Sum of T-2 and HT-2** | 100                                                            | 0.050 (5%)                       | 0.189 (19%)  | 0.011 (1%)              | 0.018 (2%)   |

AFB1 – Aflatoxin B1; AFB2 – Aflatoxin B2; AFM1 – Aflatoxin M1; BEA – Beauvericin; ENNA – Enniatin A; ENNB – Enniatin B; FB1 – Fumonisin B1; FB2 – Fumonisin B2; HQ – Hazard Quotient; LB – Lower Bound; MON – Moniliformin; PAT – Patulin; TDI – Tolerable Daily Intake; UB – Upper Bound; ZEA – Zearalenone.

\* HQ values are calculated as the sum of FB1 and FB2.

\*\* HQ values are calculated as the sum of T-2 and HT-2.

<sup>[1]</sup> Joint FAO/WHO Expert Committee on Food Additives (JECFA) *Evaluation of Certain Mycotoxins in Food: Fifty-Sixth Report of the Joint FAO/WHO Expert Committee on Food Additives*; 2001.

**Table S2.** Hazard Quotient values for mycotoxin consumption in milk samples, for total number of positives (mean and maximum concentrations) and for total number of samples (n=100) (lower (LB) and upper bound (UB)) considering PMTDI.

|                              | PMTDI (ng kg <sup>-1</sup> bw day <sup>-1</sup> ) <sup>[1]</sup> | Total number of positive samples |              | Total number of samples |              |
|------------------------------|------------------------------------------------------------------|----------------------------------|--------------|-------------------------|--------------|
|                              |                                                                  | HQ (Mean)                        | HQ (Maximum) | HQ (LB)                 | HQ (UB)      |
| <b>AFB1</b>                  | -                                                                | No PMTDI established             |              |                         |              |
| <b>AFB2</b>                  | -                                                                | No PMTDI established             |              |                         |              |
| <b>AFM1</b>                  | -                                                                | No PMTDI established             |              |                         |              |
| <b>BEA</b>                   | -                                                                | No PMTDI established             |              |                         |              |
| <b>ENNA</b>                  | -                                                                | No PMTDI established             |              |                         |              |
| <b>ENNB</b>                  | -                                                                | No PMTDI established             |              |                         |              |
| <b>FB1*</b>                  | 2000                                                             | -                                | -            | 0.0001 (0.01%)          | 0.001 (0.1%) |
| <b>FB2*</b>                  | 2000                                                             | -                                | -            | 0.0002 (0.02%)          | 0.003 (0.3%) |
| <b>HT-2**</b>                | 60                                                               | 0.02 (2%)                        | 0.072 (7%)   | 0.009 (0.9%)            | 0.01 (1%)    |
| <b>MON</b>                   | -                                                                | No PMTDI established             |              |                         |              |
| <b>PAT</b>                   | 400                                                              | -                                | -            | 0.0002 (0.02%)          | 0.01 (1%)    |
| <b>T-2**</b>                 | 60                                                               | 0.06 (6%)                        | 0.24 (24%)   | 0.009 (0.9%)            | 0.02 (2%)    |
| <b>ZEA</b>                   | 500                                                              | -                                | -            | 0.003 (0.3%)            | 0.02 (2%)    |
| <b>Sum of FB1 and FB2*</b>   | 100                                                              | 0.05 (5%)                        | 0.19 (19%)   | 0.011 81%)              | 0.02 (2%)    |
| <b>Sum of T-2 and HT-2**</b> | -                                                                | -                                | -            | -                       | -            |

**AFB1** – Aflatoxin B1; **AFB2** – Aflatoxin B2; **AFM1** – Aflatoxin M1; **BEA** – Beauvericin; **ENNA** – Enniatin A; **ENNB** – Enniatin B; **FB1** – Fumonisin B1; **FB2** – Fumonisin B2; **HQ** – Hazard Quotient; **LB** – Lower Bound; **MON** – Moniliformin; **PAT** – Patulin; **PMTDI** – Provisional Maximum Tolerable Daily Intake; **UB** – Upper Bound; **ZEA** – Zearalenone.

\* HQ values are calculated as the sum of FB1 and FB2.

\*\* HQ values are calculated as the sum of T-2 and HT-2.

<sup>[1]</sup> Joint FAO/WHO Expert Committee on Food Additives (JECFA) *Evaluation of Certain Mycotoxins in Food: Fifty-Sixth Report of the Joint FAO/WHO Expert Committee on Food Additives*; 2001.
